# Supplementary material for: Epigenetic differences between monozygotic twins discordant for amyotrophic lateral sclerosis (ALS) provide clues to disease pathogenesis
Source: PLoS One. 2017 Aug 10;12(8):e0182638. doi: 10.1371/journal.pone.0182638 (PMC5552194; doi:10.1371/journal.pone.0182638)
Supplement: S2 Table — (XLSX) [file pone.0182638.s008.xlsx]

## Sheet: Readme
		This table shows the RRBS sites detected as differentially methylated by Methylkit when comparing all ALS cases vs all matched unaffected twin siblings.Thresholds: at least 20x coverage; at least a 20% average difference; q < 0.01

## Sheet: All ALS vs nonALS
Gene	Genomic location	q value	Methylation difference % (cases - controls)	Genomic annotation	Genbank accession no.
HIST2H2BA	chr1.120906320	1.95905e-13	-26.6785	NonCodingRNA	NR_027337
HIST2H2BA	chr1.120906341	1.95905e-13	-25.5827	NonCodingRNA	NR_027337
HIST2H2BA	chr1.120906333	4.80579e-13	-26.0228	NonCodingRNA	NR_027337
	chr1.5836437	1.22287e-11	-33.7709	intergenic
HIST2H2BA	chr1.120906337	7.20271e-11	-25.0481	NonCodingRNA	NR_027337
	chr1.105433517	2.1746e-07	-24.2001	intergenic
HIST2H2BA	chr1.120906355	3.76143e-07	-25.1144	NonCodingRNA	NR_027337
	chr1.31201842	6.33553e-07	-28.1434	intergenic
	chr1.5563399	2.19345e-06	24.2394	intergenic
	chr1.157248961	6.73099e-06	-20.5988	intergenic
NPHP4	chr1.5926512	1.61388e-05	-24.1442	exon	NM_015102
LINC00982	chr1.2983950	1.96844e-05	-26.5778	NonCodingRNA	NR_024371
GABRD	chr1.1956194	2.00944e-05	-22.8751	intron	NM_000815
PRDM16	chr1.3052849	5.71549e-05	-25	intron	NM_199454
PRDM16	chr1.3206753	0.000185212	-20.9087	intron	NM_199454
DHCR24	chr1.55333525	0.000274928	-20.2111	intron	NM_014762
CASZ1	chr1.10783033	0.000309208	-21.0284	intron	NM_017766
CASZ1	chr1.10707880	0.00031472	-21.2825	exon	NM_017766
CNKSR1	chr1.26514964	0.000509104	-21.7495	NonCodingRNA	NR_023345
MEGF6	chr1.3495564	0.00294861	-22.6826	intron	NM_001409
LDLRAD1	chr1.54479875	0.00392145	-20.4149	intron	NM_001010978
GRID1	chr10.87628874	1.48363e-05	-28.0043	exon	NM_017551
	chr10.100061626	1.8346e-05	-26.0838	intergenic
MMP21	chr10.127462436	0.000232896	-22.2131	exon	NM_147191
ARHGAP22	chr10.49665669	0.00030232	-20.4555	intron	NM_001256026
LRRC20	chr10.72068186	0.00366505	-20.9804	intron	NM_001278213
	chr11.62194011	0	-37.3427	intergenic
MYRF	chr11.61553285	1.15659e-07	-21.6831	exon	NM_013279
KCNQ1	chr11.2817373	2.76281e-06	-21.4836	intron	NM_181798
SHANK2	chr11.70567134	3.63793e-06	-22.5601	intron	NM_012309
RIN1	chr11.66099988	4.80485e-06	-26.6461	exon	NM_004292
KCNQ1	chr11.2817328	2.61311e-05	-20.3912	intron	NM_181798
NADSYN1	chr11.71191380	0.000519362	-22.0496	intron	NM_018161
	chr11.8336878	0.000549	-23.1972	intergenic
	chr11.69076744	0.00113843	-21.6188	intergenic
SLC6A5	chr11.20672612	0.00227612	-20.4158	intron	NM_004211
SLC43A1	chr11.57267315	0.00683805	-22.2061	intron	NM_001198810
EIF4B	chr12.53406262	4.68689e-08	-30.5552	intron	NM_001417
TMEM132D	chr12.129612567	4.42939e-07	-24.7342	intron	NM_133448
	chr12.133062856	2.97725e-05	-22.1	intergenic
LEPREL2	chr12.6946270	0.00345107	-20.5495	intron	NM_014262
ANKRD20A19P	chr13.24520314	6.82906e-06	-26.7217	NonCodingRNA	NR_073430
MCF2L	chr13.113647539	4.51258e-05	-26.7871	intron	NM_001112732
	chr13.112127304	0.000228564	-20.3267	intergenic
	chr13.111598496	0.00382782	-20.1111	intergenic
	chr14.19108096	4.61356e-11	-26.4616	intergenic
	chr14.104808119	0.000278899	-23.0206	intergenic
GABRA5	chr15.27141132	5.44599e-06	-24.0786	intron	NM_001165037
PLA2G4B	chr15.42139658	1.81776e-05	-24.5633	exon	NM_001114633
	chr15.94701019	0.000100076	21.9037	intergenic
NLRC3	chr16.3614206	1.62523e-06	-27.1473	exon	NM_178844
CALB2	chr16.71419149	5.00479e-05	-23.7726	intron	NM_001740
ZNF843	chr16.31453448	0.000142299	21.0424	intron	NM_001136509
E4F1	chr16.2283620	0.000409182	-22.2527	exon	NM_004424
	chr16.87915445	0.000469163	-20.0081	intergenic
	chr16.88759653	0.000502975	-23.1098	intergenic
CRISPLD2	chr16.84873189	0.000545907	-20.5553	intron	NM_031476
RBFOX1	chr16.7694280	0.000859215	23.6338	intron	NM_145891
	chr16.1149852	0.00463149	-21.8571	intergenic
RBFOX3	chr17.77123224	3.41655e-05	-20.7768	intron	NM_001082575
MED9	chr17.17394732	3.63104e-05	-25.7538	exon	NM_018019
	chr17.80260548	5.57446e-05	-23.9539	intergenic
STX8	chr17.9410708	5.6828e-05	-20.8519	intron	NM_004853
RBFOX3	chr17.77137066	0.00847067	-20.1064	intron	NM_001082575
	chr18.43881863	1.84035e-05	-25	intergenic
	chr18.77312842	0.000272259	-22.7941	intergenic
SEPW1	chr19.48287675	5.29622e-07	-23.3723	3'UTR	NM_003009
PEPD	chr19.33952725	5.12571e-06	25.0406	intron	NM_001166057
ATP8B3	chr19.1806463	5.0686e-05	20.0659	intron	NM_001178002
	chr19.37795013	0.000156071	-22.0108	intergenic
CSNK1G2	chr19.1975379	0.000287536	-24.6288	intron	NM_001319
KDM4B	chr19.5103181	0.000500998	-22.6891	intron	NM_015015
ZBTB7A	chr19.4055917	0.000543245	-24.0561	intron	NM_015898
	chr19.39495739	0.0042522	-20.7568	intergenic
PPP5D1	chr19.47049710	0.00459068	20.277	intron	NM_001205281
	chr19.28400430	0.00478325	-22.152	intergenic
	chr2.133023221	0	40.1317	intergenic
TCF7L1	chr2.85533671	1.85407e-09	-32.3556	exon	NM_031283
	chr2.86209341	7.99209e-09	-32.6616	intergenic
CAB39	chr2.231589896	4.56056e-07	-22.2363	intron	NM_001130849
	chr2.242472461	1.34741e-06	-29.1493	intergenic
KLHL29	chr2.23838401	5.09571e-05	-20.669	intron	NM_052920
	chr2.10375647	6.00035e-05	-20.0513	intergenic
GAREML	chr2.26397661	0.000671469	-21.4228	intron	NM_001168241
EVA1A	chr2.75720391	0.0011445	-21.978	exon	NM_001135032
	chr20.36610051	2.85147e-05	-25.1677	intergenic
HSPA12B	chr20.3733093	0.000221846	22.6599	3'UTR	NM_001197327
OSBPL2	chr20.60861607	0.000413363	-20.782	intron	NM_001278649
LOC149950	chr20.31190934	0.00132014	-21.2306	NonCodingRNA	NR_034152
	chr21.37401722	0	-38.3427	intergenic
ABCG1	chr21.43707970	8.26058e-10	-30.6301	intron	NM_207174
FAM19A5	chr22.49089395	1.65859e-07	-27.1581	intron	NM_015381
	chr22.39569085	4.16091e-05	-21.2343	intergenic
FAM19A5	chr22.49042587	4.36172e-05	-23.0112	intron	NM_015381
MN1	chr22.28161680	4.37829e-05	-20.7947	intron	NM_002430
	chr22.47695828	0.000104528	-23.7767	intergenic
LARGE	chr22.34269178	0.000269564	-21.9472	intron	NM_004737
	chr22.48821271	0.000499727	-22.0395	intergenic
	chr22.48223718	0.00116168	-22.6944	intergenic
	chr22.29188920	0.00146416	-21.9717	intergenic
TRMT2A	chr22.20100459	0.00153061	-22.4981	exon	NM_182984
	chr22.48223713	0.00267076	-21.9973	intergenic
PANX2	chr22.50610628	0.00900156	21.243	intron	NM_052839
	chr22.43911533	0.00943749	-20.8527	intergenic
SEMA5B	chr3.122631767	4.61356e-11	-29.7955	exon	NM_001256347
	chr3.197366764	1.40039e-07	-22.4175	intergenic
	chr3.83453294	2.12171e-07	-28.3043	intergenic
	chr3.42008186	5.29502e-05	27.9424	intergenic
	chr4.1788776	2.26295e-08	33.3209	intergenic
HTRA3	chr4.8278124	1.64133e-07	-29.0398	intron	NM_053044
	chr4.88807245	2.63703e-07	-21.8637	intergenic
UGDH-AS1	chr4.39542927	0.000145932	-25.8772	NonCodingRNA	NR_047679
C4orf21	chr4.113489792	0.00771402	-20.2611	intron	NM_018392
ADAMTS2	chr5.178598603	3.11212e-06	-24.1427	intron	NM_021599
	chr5.760660	3.90052e-05	-22.7405	intergenic
ARL14EPL	chr5.115389230	0.000929151	-22.0755	intron	NM_001195581
	chr6.6898778	1.95905e-13	-26.472	intergenic
PARK2	chr6.163096302	1.91316e-11	-26.4561	intron	NM_013987
	chr6.134012697	5.52139e-08	-28.2959	intergenic
EXOC2	chr6.621991	4.52889e-05	-29.3237	intron	NM_018303
PTPRN2	chr7.157453741	7.79076e-09	-20.6608	intron	NM_130842
	chr7.476643	0.000180876	-23.832	intergenic
	chr8.144222338	1.69523e-07	-27.9529	intergenic
	chr8.144222314	1.50458e-05	-24.5286	intergenic
ERICH1	chr8.652316	0.000194494	20.4739	intron	NM_207332
	chr8.145594413	0.000774347	-21.5016	intergenic
TRAPPC9	chr8.141360875	0.00392145	-20.5534	intron	NM_001160372
	chr8.38010720	0.00872592	-20.6162	intergenic
	chr9.66458345	0	20.6638	intergenic
VAV2	chr9.136810660	0.000585164	-22.1634	intron	NM_001134398
AFF2	chrX.147583194	4.22381e-06	-22.7566	intron	NM_001169122
RAB39B	chrX.154493532	0.00018766	-20.4993	exon	NM_171998
KIAA2022	chrX.74145685	0.000417843	-20.2439	upstream_protein_coding	NM_001008537
MTM1	chrX.149736890	0.0012681	-20.2231	upstream_protein_coding	NM_000252
	chrY.13488182	8.37705e-08	20.8155	intergenic
