# Supplementary material for: Epigenetic differences between monozygotic twins discordant for amyotrophic lateral sclerosis (ALS) provide clues to disease pathogenesis
Source: PLoS One. 2017 Aug 10;12(8):e0182638. doi: 10.1371/journal.pone.0182638 (PMC5552194; doi:10.1371/journal.pone.0182638)
Supplement: S5 Table — (XLSX) [file pone.0182638.s011.xlsx]

## Sheet: Read me
			These tables show the Top Canonical Pathways of genes harbouring outlier sites identified by IPA, by twin pair. Only statisticaly significant pathways are shown (i.e. -log p>1.3 = p <0.05)

## Sheet: Table S5A - Pair 1
Ingenuity Canonical Pathways	-log(p-value)	Ratio	Molecules
Synaptic Long Term Depression	3.67	0.152	NOS1,GNAS,RYR2,HRAS,GRM4,PLCH2,CRHR1,PLA2G6,RRAS2,PLCE1,MAP2K2,PRKCD,GUCY1A2,IGF1R,GRM6,RYR1,PPP2R2C
Cellular Effects of Sildenafil (Viagra)	3.13	0.152	CACNG3,KCNN1,KCNN3,PLCE1,KCNQ2,GNAS,CACNA1D,CACNG4,GUCY1A2,CACNA1C,KCNQ3,MYH11,PLCH2,KCNH2
T Cell Receptor Signaling	2.74	0.159	CD247,SHB,FYN,LCK,RRAS2,MAP2K2,GRAP2,CSK,VAV3,NFATC2,HRAS
GABA Receptor Signaling	2.63	0.164	GABRG3,KCNN3,KCNN1,GABRA5,GAD2,GABRB3,GNAS,KCNQ2,KCNQ3,KCNH2
Phospholipase C Signaling	2.37	0.109	CD247,RND2,FYN,HDAC4,GNAS,RPS6KA3,HRAS,CREB5,GNG7,PLA2G6,LCK,PLCE1,RRAS2,AHNAK,MAP2K2,GRAP2,PRKCD,NFATC2,MEF2C,RALGDS
PI3K Signaling in B Lymphocytes	2.29	0.129	FYN,AKT2,C3,HRAS,PLCH2,AKT1,PLCE1,RRAS2,MAP2K2,IRS1,VAV3,FOXO3,NFATC2
Natural Killer Cell Signaling	2.28	0.147	CD247,FYN,LCK,AKT2,AKT1,RRAS2,MAP2K2,PRKCD,VAV3,HRAS
GDNF Family Ligand-Receptor Interactions	2.26	0.155	DOK5,RRAS2,MAP2K2,GFRA1,IRS1,DOK7,HRAS,GFRA2,DOK3
14-3-3-mediated Signaling	2.13	0.128	SRPK2,TRAF2,AKT2,AKT1,PLCE1,RRAS2,MAP2K2,TP73,PRKCD,HRAS,PLCH2,AKT1S1
FAK Signaling	2.11	0.139	FYN,AKT2,AKT1,RRAS2,MAP2K2,ASAP1,CSK,HRAS,CAPN2,TNS1
Axonal Guidance Signaling	2.1	0.0899	SLIT3,FYN,GLI2,RGS3,UNC5A,ARPC1B,PDGFA,UNC5B,HRAS,ADAM11,LIMK2,PLCH2,ROBO1,ADAMTS2,GNG7,AKT1,PLCE1,MAP2K2,ECE2,BAIAP2,PLXNB2,SHANK2,WNT5B,EFNA2,AKT2,GNAS,C9orf3,RRAS2,MAG,PRKCD,NFATC2,BMP7
Fc Epsilon RI Signaling	2.07	0.131	FYN,PLA2G6,AKT2,AKT1,RRAS2,MAP2K2,GRAP2,PRKCD,VAV3,HRAS,MAP2K3
Neuropathic Pain Signaling In Dorsal Horn Neurons	2	0.128	GRIN1,KCNN3,KCNN1,PLCE1,KCNQ2,PRKCD,GRM6,KCNQ3,GRM4,PLCH2,KCNH2
Regulation of the Epithelial-Mesenchymal Transition Pathway	1.93	0.107	ETS1,AKT2,SNAI1,HRAS,PARD6G,MAML1,FGF17,FGFR3,AKT1,RRAS2,MAP2K2,FGF18,DVL3,MAP2K3,WNT5B,TCF7L2
P2Y Purigenic Receptor Signaling Pathway	1.92	0.12	ITGA2B,AKT2,GNAS,AKT1,PLCE1,RRAS2,MAP2K2,PRKCD,HRAS,PLCH2,CREB5,GNG7
Pyridoxal 5'-phosphate Salvage Pathway	1.89	0.145	AKT2,MAP2K2,SGK1,PRKCD,CSNK1D,GRK5,LIMK2,MAP2K3
Netrin Signaling	1.86	0.171	UNC5A,RYR2,UNC5B,NFATC2,RYR1,ENAH
Acute Myeloid Leukemia Signaling	1.85	0.134	RUNX1,AKT2,AKT1,RRAS2,MAP2K2,CEBPA,HRAS,MAP2K3,TCF7L2
ERK5 Signaling	1.85	0.143	AKT1,RRAS2,SGK1,FOXO3,RPS6KA3,HRAS,MEF2C,CREB5
Epithelial Adherens Junction Signaling	1.83	0.113	AKT2,AGGF1,AKT1,RRAS2,ARPC1B,SORBS1,MYO7A,BAIAP2,SNAI1,HRAS,MYH11,MAGI2,TCF7L2
Non-Small Cell Lung Cancer Signaling	1.81	0.14	CDKN2A,AKT2,AKT1,RRAS2,MAP2K2,FOXO3,HRAS,RXRA
Ephrin Receptor Signaling	1.78	0.103	EFNA2,GRIN1,FYN,AKT2,GNAS,RGS3,ARPC1B,PDGFA,HRAS,LIMK2,CREB5,GNG7,RRAS2,AKT1,MAP2K2,SORBS1
Role of NFAT in Regulation of the Immune Response	1.76	0.108	CD247,FYN,AKT2,GNAS,CSNK1G2,CSNK1D,HRAS,GNG7,LCK,AKT1,RRAS2,MAP2K2,NFATC2,MEF2C
Melanoma Signaling	1.75	0.162	CDKN2A,AKT2,AKT1,RRAS2,MAP2K2,HRAS
Wnt/Ca+ pathway	1.69	0.158	PLCE1,NFATC2,DVL3,PLCH2,CREB5,WNT5B
Glioblastoma Multiforme Signaling	1.69	0.108	RND2,CDKN2A,AKT2,AKT1,PLCE1,RRAS2,MAP2K2,PDGFA,PRKCD,IGF1R,HRAS,PLCH2,WNT5B
Insulin Receptor Signaling	1.68	0.111	FYN,AKT2,ASIC2,AKT1,RRAS2,MAP2K2,SGK1,IRS1,FOXO3,RPTOR,HRAS,GRB10
p70S6K Signaling	1.63	0.113	AKT2,AKT1,PLCE1,RRAS2,MAP2K2,EEF2,PRKCD,IRS1,HRAS,PPP2R2C,PLCH2
Estrogen-Dependent Breast Cancer Signaling	1.63	0.14	AKT2,AKT1,RRAS2,IGF1R,HRAS,CREB5,ESR1
Adipogenesis pathway	1.59	0.108	CTNNBIP1,CDKN2A,FGFR3,LEP,AKT1,HDAC4,BMPR1A,SREBF1,CEBPA,BMP7,TBL1XR1,TCF7
Synaptic Long Term Potentiation	1.58	0.111	GRIN1,PLCE1,RRAS2,MAP2K2,PRKCD,GRM6,CACNA1C,HRAS,GRM4,PLCH2,CREB5
nNOS Signaling in Skeletal Muscle Cells	1.55	0.25	NOS1,RYR2,RYR1
DNA damage-induced 14-3-3σ Signaling	1.55	0.25	AKT2,AKT1,ATR
UVC-Induced MAPK Signaling	1.54	0.146	RRAS2,SMPD4,MAP2K2,PRKCD,HRAS,ATR
CD28 Signaling in T Helper Cells	1.53	0.114	CD247,FYN,LCK,AKT2,AKT1,MAP2K2,ARPC1B,GRAP2,CSK,NFATC2
Citrulline-Nitric Oxide Cycle	1.53	0.4	NOS1,ASS1
Sertoli Cell-Sertoli Cell Junction Signaling	1.49	0.0993	NOS1,AKT2,TJP3,AGGF1,AKT1,RRAS2,MAP2K2,SORBS1,MYO7A,GUCY1A2,HRAS,MAP2K3,SPTAN1,MAGI2
AMPK Signaling	1.48	0.0968	AKT2,GNAS,LEP,CHRNA4,EEF2,CHRNB1,CREB5,MLST8,AKT1,IRS1,FOXO3,RPTOR,PPP2R2C,MAP2K3,AKT1S1
NGF Signaling	1.47	0.111	AKT2,AKT1,RRAS2,SMPD4,MAP2K2,PRKCD,TRAF4,RPS6KA3,HRAS,CREB5
Inhibition of Angiogenesis by TSP1	1.46	0.156	HSPG2,FYN,AKT2,AKT1,GUCY1A2
GM-CSF Signaling	1.43	0.127	RUNX1,ETS1,AKT2,AKT1,RRAS2,MAP2K2,HRAS
Coagulation System	1.4	0.174	F10,F9,VWF,PLAT
Role of MAPK Signaling in the Pathogenesis of Influenza	1.39	0.125	PLA2G6,AKT2,AKT1,RRAS2,MAP2K2,HRAS,MAP2K3
UVA-Induced MAPK Signaling	1.39	0.118	PLCE1,RRAS2,SMPD4,PARP4,RPS6KA3,HRAS,TNKS2,PLCH2
IL-2 Signaling	1.37	0.133	LCK,AKT2,AKT1,RRAS2,MAP2K2,HRAS
Cardiomyocyte Differentiation via BMP Receptors	1.37	0.214	BMPR1A,MEF2C,BMP7
Bladder Cancer Signaling	1.36	0.116	FGF17,CDKN2A,FGFR3,RRAS2,MAP2K2,FGF18,HRAS,MMP17
Salvage Pathways of Pyrimidine Ribonucleotides	1.36	0.116	AKT2,MAP2K2,SGK1,PRKCD,CSNK1D,GRK5,LIMK2,MAP2K3
Role of Macrophages, Fibroblasts and Endothelial Cells in Rheumatoid Arthritis	1.35	0.0866	LRP5,AKT2,PDGFA,HRAS,CREB5,PLCH2,ROR2,TRAF2,AKT1,PLCE1,RRAS2,MAP2K2,PRKCD,TRAF4,CEBPA,NFATC2,MAP2K3,WNT5B,LRP1,TCF7L2
Endometrial Cancer Signaling	1.33	0.13	AKT2,AKT1,RRAS2,MAP2K2,FOXO3,HRAS
Dopamine-DARPP32 Feedback in cAMP Signaling	1.33	0.0963	NOS1,GRIN1,GNAS,CACNA1D,CSNK1G2,CSNK1D,CACNA1C,PLCH2,CREB5,PLCE1,PRKCD,GUCY1A2,PPP2R2C
CREB Signaling in Neurons	1.3	0.0933	GRIN1,AKT2,GNAS,HRAS,GRM4,PLCH2,CREB5,GNG7,AKT1,PLCE1,RRAS2,MAP2K2,PRKCD,GRM6

## Sheet: Table S5B - Pair 2
Ingenuity Canonical Pathways	-log(p-value)	Ratio	Molecules
Neuropathic Pain Signaling In Dorsal Horn Neurons	4.75	0.186	GRIN1,SRC,GRIN3B,GRIN2A,GRM1,GRIN2D,GRM4,PLCH2,PRKCZ,PRKCG,KCNQ2,PRKCD,ITPR3,PRKAR1B,PRKACA,PRKAG2
Synaptic Long Term Potentiation	4.53	0.172	GRIN1,GRIN3B,GRIN2A,GRM1,GRIN2D,GNA11,GNA14,GRM4,PLCH2,PRKCZ,PRKCG,MAP2K2,PRKCD,ITPR3,PRKAR1B,PRKACA,PRKAG2
Sperm Motility	4.49	0.178	CACNA1G,PDE2A,GNAS,CACNA1H,PLCH2,PRKCZ,PRKCG,CNGB1,PRKG1,PRKCD,ITPR3,PRKAR1B,PRKACA,PRKAG2,MST1R,CATSPER1
Dopamine-DARPP32 Feedback in cAMP Signaling	4.26	0.148	GRIN1,GRIN2A,GRIN3B,GNAS,PPP1R1B,GRIN2D,CSNK1D,PLCH2,CACNA1A,PRKCZ,PRKCG,PRKG1,CDK5,ADCY5,KCNJ5,PRKCD,ITPR3,PRKAR1B,PRKACA,PRKAG2
CREB Signaling in Neurons	4.08	0.14	GRIN1,GRIN2A,GNAS,GRM1,GRIN2D,GNA11,GNA14,GRM4,PLCH2,PRKCZ,PRKCG,AKT1,MAP2K2,GRIK4,ADCY5,PRKCD,ITPR3,PRKAR1B,PRKACA,PRKAG2,GNB1L
GPCR-Mediated Nutrient Sensing in Enteroendocrine Cells	3.96	0.186	GNAS,FFAR4,GNA11,GNA14,PLCH2,PRKCZ,PRKCG,ADCY5,PRKCD,ITPR3,PRKACA,PRKAG2,PRKAR1B
Gap Junction Signaling	3.6	0.141	SRC,DBN1,GNAS,GUCY2D,CSNK1D,PLCH2,PRKCZ,PRKCG,PRKG1,AKT1,MAP2K2,ADCY5,PRKCD,ITPR3,PRKAR1B,SGSM3,PRKACA,PRKAG2
Axonal Guidance Signaling	3.43	0.101	GLI2,ARPC1B,NTF4,WNT3,GNA11,SEMA6B,GNA14,PLCH2,PRKCZ,ADAMTS2,EPHB1,EPHA8,AKT1,CDK5,GLI3,MAP2K2,ECE2,WNT7B,BAIAP2,ABLIM3,PRKAR1B,PLXNB1,ABLIM2,PLXNB2,SHANK2,GNB1L,RTN4R,GNAS,WNT9A,PRKCG,SRGAP3,SEMA4D,PRKCD,PRKACA,PRKAG2,EPHA2
G Beta Gamma Signaling	3.31	0.16	SRC,AKT1,GNAS,KCNJ5,PRKCD,GNA11,PRKACA,PRKAR1B,PRKAG2,GNA14,GNB1L,PRKCZ,PRKCG
Calcium Signaling	3.16	0.129	GRIN1,CALR,GRIN3B,GRIN2A,HDAC4,TNNT3,GRIN2D,TRDN,CHRNB4,HDAC5,ATP2B2,RCAN1,TRPV6,CHRNB2,ITPR3,PRKAR1B,PRKACA,PRKAG2
Nitric Oxide Signaling in the Cardiovascular System	3.15	0.155	PDE2A,GUCY2D,PRKCZ,CACNA1A,PRKCG,PRKG1,AKT1,MAP2K2,PRKCD,ITPR3,PRKACA,PRKAG2,PRKAR1B
Corticotropin Releasing Hormone Signaling	3.08	0.146	GNAS,GLI2,GUCY2D,PRKCZ,PRKCG,GLI3,MAP2K2,ADCY5,PRKCD,UCN,ITPR3,PRKAR1B,PRKACA,PRKAG2
Circadian Rhythm Signaling	2.97	0.233	GRIN1,GRIN3B,GRIN2A,NR1D1,VIPR2,GRIN2D,CSNK1D
Protein Kinase A Signaling	2.94	0.102	AKAP12,LIPE,PLCH2,DUSP2,PRKCZ,AKAP2,PTPRC,MAP2K2,GLI3,TGFB1,ADCY5,FLNA,PTPN1,PRKAR1B,GNB1L,PTPRT,PDE2A,PTPRE,GNAS,YWHAE,PPP1R1B,PRKCG,TULP2,CNGB1,PRKCD,ITPR3,PTPRS,PRKACA,PRKAG2
Role of NFAT in Cardiac Hypertrophy	2.87	0.119	SRC,HDAC4,GNAS,PLCH2,PRKCZ,HDAC5,PRKCG,RCAN1,AKT1,MAP2K2,TGFB1,ADCY5,PRKCD,ITPR3,PRKAR1B,IGF1R,PRKACA,PRKAG2,GNB1L
eNOS Signaling	2.8	0.132	GNAS,CHRNB4,PRKCZ,PRKCG,CNGB1,PRKG1,AKT1,ADCY5,STUB1,PRKCD,ITPR3,PRKAR1B,PRKACA,PRKAG2,ESR2
PPARα/RXRα Activation	2.57	0.118	GNAS,CPT1B,GNA11,GNA14,PLCH2,AP2A2,ABCA1,MAP2K2,ADCY5,TGFB1,PRKAR1B,PRKAG2,PRKACA,INSR,NCOR2,RXRA,MED24
Androgen Signaling	2.53	0.133	SRC,CALR,GNAS,NCOA2,PRKCD,GNA11,PRKACA,PRKAR1B,PRKAG2,GNA14,GNB1L,PRKCZ,PRKCG
Synaptic Long Term Depression	2.44	0.125	GNAS,GRM1,GUCY2D,GNA11,GNA14,GRM4,PLCH2,PRKCZ,PRKCG,PRKG1,MAP2K2,PRKCD,ITPR3,IGF1R
α-Adrenergic Signaling	2.42	0.141	GNAS,MAP2K2,ADCY5,PRKCD,ITPR3,PRKAR1B,PRKACA,PRKAG2,GNB1L,PRKCZ,PRKCG
PXR/RXR Activation	2.34	0.167	AKT1,CPT1A,ALDH3A2,PRKAR1B,PRKACA,PRKAG2,INSR,RXRA
Cellular Effects of Sildenafil (Viagra)	2.31	0.13	PDE2A,PRKG1,GNAS,KCNQ2,ADCY5,GUCY2D,ITPR3,PRKAR1B,PRKACA,PRKAG2,PLCH2,CACNA1A
GPCR-Mediated Integration of Enteroendocrine Signaling Exemplified by an L Cell	2.3	0.153	GNAS,ADCY5,ITPR3,GNA11,PRKAR1B,PRKACA,PRKAG2,GNA14,PLCH2
Wnt/β-catenin Signaling	2.26	0.113	SRC,LRP5,WNT3,WNT9A,CSNK1D,MDM2,AKT1,APC2,TGFB1,WNT7B,TLE3,SOX14,NR5A2,SOX8,DVL3,SOX18
Hepatic Cholestasis	2.18	0.114	GNAS,TGFB1,ADCY5,SREBF1,TNFRSF1A,ABCC1,PRKCD,PRKAR1B,PRKACA,PRKAG2,NR5A2,INSR,RXRA,PRKCZ,PRKCG
Insulin Receptor Signaling	2.16	0.12	RAPGEF1,AKT1,ASIC2,MAP2K2,PTPN1,PRKACA,RPTOR,PRKAR1B,PRKAG2,LIPE,INSR,PRKCZ,GRB10
CDK5 Signaling	2.06	0.126	LAMA5,GNAS,MAP2K2,CDK5,MAPK4,PPP1R1B,ADCY5,PRKAR1B,PRKACA,PRKAG2,CACNA1A
Branched-chain α-keto acid Dehydrogenase Complex	2.05	0.667	BCKDHA,BCKDHB
nNOS Signaling in Neurons	2.05	0.163	GRIN1,GRIN3B,GRIN2A,PRKCD,GRIN2D,PRKCZ,PRKCG
P2Y Purigenic Receptor Signaling Pathway	2.02	0.12	GNAS,AKT1,MAP2K2,ADCY5,PRKCD,PRKAR1B,PRKACA,PRKAG2,GNB1L,PLCH2,PRKCZ,PRKCG
Sonic Hedgehog Signaling	1.96	0.2	GLI2,GLI3,PRKAR1B,PRKACA,PRKAG2
GNRH Signaling	1.94	0.113	SRC,GNAS,GNA11,GNA14,PRKCZ,PRKCG,MAP2K2,ADCY5,PRKCD,ITPR3,PRKACA,PRKAG2,PRKAR1B
Glutamate Receptor Signaling	1.93	0.143	GRIN1,GRIN3B,GRIN2A,GRIK4,GRM1,GRIN2D,SLC1A1,GRM4
Netrin Signaling	1.93	0.171	PRKG1,ABLIM3,PRKAR1B,PRKACA,PRKAG2,ABLIM2
Ephrin Receptor Signaling	1.9	0.103	GRIN1,RAPGEF1,SRC,GRIN3B,GRIN2A,GNAS,ARPC1B,GRIN2D,GNA11,GNA14,EPHB1,AKT1,EPHA8,MAP2K2,GNB1L,EPHA2
Relaxin Signaling	1.88	0.111	TULP2,PDE2A,AKT1,GNAS,ADCY5,GUCY2D,GNA11,PRKACA,PRKAR1B,PRKAG2,GNA14,GNB1L,PRKCZ
VDR/RXR Activation	1.82	0.129	LRP5,COL13A1,NCOA2,TRPV6,PRKCD,NCOR2,RXRA,PRKCZ,PRKCG
Melatonin Signaling	1.8	0.136	MAP2K2,PRKCD,PRKAR1B,PRKACA,PRKAG2,PLCH2,PRKCZ,PRKCG
Glioblastoma Multiforme Signaling	1.8	0.108	RB1,SRC,AKT1,MAP2K2,RHOB,WNT3,WNT7B,PRKCD,WNT9A,ITPR3,IGF1R,MDM2,PLCH2
Role of Wnt/GSK-3β Signaling in the Pathogenesis of Influenza	1.79	0.146	NCOA2,WNT3,APC2,WNT7B,WNT9A,CSNK1D,DVL3
Gustation Pathway	1.78	0.12	PDE2A,TULP2,ASIC2,GNAS,ADCY5,ITPR3,P2RX1,PRKAR1B,PRKACA,PRKAG2
RAR Activation	1.76	0.0994	SRC,GNAS,SDR16C5,PRKCZ,PRKCG,AKT1,TGFB1,ADCY5,PRKCD,PRKAG2,PRKACA,PRKAR1B,NCOR2,RXRA,ACTL6B,RBP4
Leptin Signaling in Obesity	1.72	0.131	GNAS,AKT1,MAP2K2,ADCY5,PRKAR1B,PRKACA,PRKAG2,PLCH2
Methionine Degradation I (to Homocysteine)	1.69	0.273	PRMT8,NSUN4,AHCY
Endothelin-1 Signaling	1.67	0.101	SRC,GNAS,MAPK4,GUCY2D,GNA11,PTGS1,GNA14,PLCH2,PRKCZ,PRKCG,ECE2,ADCY5,PRKCD,ITPR3
Colorectal Cancer Metastasis Signaling	1.6	0.0918	SRC,LRP5,GNAS,WNT3,TNFRSF1A,WNT9A,MMP23B,AKT1,RHOB,MAP2K2,ADCY5,TGFB1,WNT7B,PRKAR1B,PRKACA,PRKAG2,GNB1L,RALGDS
Cysteine Biosynthesis III (mammalia)	1.59	0.25	PRMT8,NSUN4,AHCY
Basal Cell Carcinoma Signaling	1.57	0.132	GLI2,GLI3,WNT3,APC2,WNT7B,WNT9A,DVL3
CXCR4 Signaling	1.49	0.0985	SRC,AKT1,GNAS,MAP2K2,RHOB,ADCY5,PRKCD,ITPR3,GNA11,GNA14,GNB1L,PRKCZ,PRKCG
Ovarian Cancer Signaling	1.45	0.103	SRC,RB1,AKT1,MAP2K2,WNT3,WNT7B,WNT9A,PTGS1,PRKAR1B,PRKACA,PRKAG2
14-3-3-mediated Signaling	1.44	0.106	SRC,AKT1,MAP2K2,YWHAE,TP73,TNFRSF1A,PRKCD,PLCH2,PRKCZ,PRKCG
Molecular Mechanisms of Cancer	1.43	0.0812	RAPGEF1,WNT3,GNA11,GNA14,PRKCZ,RB1,AKT1,CDK5,MAP2K2,RHOB,TGFB1,ADCY5,WNT7B,PRKAR1B,HIPK2,RALGDS,SRC,LRP5,GNAS,WNT9A,MDM2,PRKCG,PRKCD,PRKAG2,PRKACA
IL-12 Signaling and Production in Macrophages	1.42	0.105	AKT1,MAP2K2,TGFB1,PRKCD,MST1,MST1R,RXRA,PRKCZ,PRKCG,RBP4
Aryl Hydrocarbon Receptor Signaling	1.37	0.1	AHRR,SRC,RB1,NCOA2,TP73,TGFB1,ALDH3A2,MDM2,NCOR2,RXRA,ESR2
Neuroprotective Role of THOP1 in Alzheimer's Disease	1.37	0.143	YWHAE,ECE2,PRKAR1B,PRKACA,PRKAG2
Amyloid Processing	1.35	0.128	AKT1,CDK5,CSNK1D,PRKAR1B,PRKACA,PRKAG2
Renin-Angiotensin Signaling	1.34	0.102	GNAS,MAP2K2,ADCY5,PRKCD,ITPR3,PRKAR1B,PRKACA,PRKAG2,PRKCZ,PRKCG
Phosphatidylglycerol Biosynthesis II (Non-plastidic)	1.32	0.2	AGPAT2,PGS1,AGPAT3
AMPK Signaling	1.3	0.0903	SRC,CPT1A,GNAS,CPT1B,CHRNB4,LIPE,AKT1,PRKAG2,PRKAR1B,RPTOR,PRKACA,INSR,ACTL6B,GNB1L
Gαq Signaling	1.3	0.0945	GNAS,AKT1,MAP2K2,RHOB,GRM1,PRKCD,ITPR3,GNA11,GNA14,GNB1L,PRKCZ,PRKCG

## Sheet: Table S5C- Pair 3
Ingenuity Canonical Pathways	-log(p-value)	Ratio	Molecules
CREB Signaling in Neurons	4.6	0.12	GRIN1,AKT2,POLR2F,GNAS,GRIN2D,ADCY3,ITPR1,GRM4,PLCH2,GNG7,GRIK4,GRIN2C,ADCY1,PRKAR1B,PRKAG2,AKT3,RPS6KA1,MAP2K1
Role of NFAT in Cardiac Hypertrophy	3.75	0.107	HDAC9,SRC,AKT2,LIF,GNAS,HDAC4,ADCY3,SLC8A2,ITPR1,PLCH2,GNG7,MEF2D,ADCY1,PRKAR1B,PRKAG2,AKT3,MAP2K1
Melanocyte Development and Pigmentation Signaling	3.36	0.141	SRC,GNAS,ADCY1,ADCY3,PRKAR1B,RPS6KA3,PRKAG2,RPS6KA2,RPS6KA1,MAP2K1
Leptin Signaling in Obesity	3.22	0.148	AKT2,GNAS,ADCY1,ADCY3,PRKAR1B,PRKAG2,AKT3,PLCH2,MAP2K1
Corticotropin Releasing Hormone Signaling	2.86	0.115	GNAS,GLI2,MEF2D,ADCY1,ADCY3,PRKAR1B,PRKAG2,ITPR1,NOS3,NOS2,MAP2K1
Gustation Pathway	2.82	0.12	ASIC2,GNAS,ADCY1,ADCY3,P2RX1,PRKAR1B,PRKAG2,ITPR1,PDE6B,GNG7
Synaptic Long Term Potentiation	2.75	0.111	GRIN1,GRIN2C,GRIN2D,ADCY1,PRKAR1B,PRKAG2,GRM4,ITPR1,RPS6KA1,PLCH2,MAP2K1
eNOS Signaling	2.75	0.105	AKT2,GNAS,FLT1,STUB1,FLT4,ADCY1,ADCY3,PRKAR1B,PRKAG2,AKT3,ITPR1,NOS3
Axonal Guidance Signaling	2.73	0.073	SLIT3,NTF3,PLXNA3,GLI2,SLIT1,EPHB2,PLCH2,ABLIM1,GNG7,ADAMTS2,WNT7B,PRKAR1B,AKT3,PSMD14,ABLIM2,SHANK2,PLXNB3,MAP2K1,EFNA2,PAK4,AKT2,GNAS,ROBO3,PRKAG2,BMP7,NRP1
Neuropathic Pain Signaling In Dorsal Horn Neurons	2.7	0.116	SRC,GRIN1,KCNN3,GRIN2C,GRIN2D,PRKAR1B,PRKAG2,GRM4,ITPR1,PLCH2
GPCR-Mediated Integration of Enteroendocrine Signaling Exemplified by an L Cell	2.68	0.136	GNAS,SSTR5,ADCY1,ADCY3,PRKAR1B,PRKAG2,ITPR1,PLCH2
Relaxin Signaling	2.66	0.103	AKT2,GNAS,ADCY1,ADCY3,PRKAR1B,PRKAG2,AKT3,NOS3,NOS2,MAP2K1,PDE6B,GNG7
VEGF Family Ligand-Receptor Interactions	2.54	0.129	AKT2,PLA2G4D,FLT1,FLT4,AKT3,NOS3,MAP2K1,NRP1
Cellular Effects of Sildenafil (Viagra)	2.48	0.109	CACNG2,KCNN3,GNAS,ADCY1,ADCY3,PRKAR1B,PRKAG2,ITPR1,PLCH2,NOS3
α-Adrenergic Signaling	2.46	0.115	GNAS,ADCY1,ADCY3,PRKAR1B,PRKAG2,SLC8A2,ITPR1,MAP2K1,GNG7
Sertoli Cell-Sertoli Cell Junction Signaling	2.42	0.0922	SRC,CTNNA2,AKT2,JAM3,MYO7A,PRKAR1B,PRKAG2,AKT3,CLDN14,NOS2,NOS3,MAP2K1,PVRL2
Aryl Hydrocarbon Receptor Signaling	2.39	0.1	NR2F1,SRC,NFIX,CCND3,TP73,NQO2,RARB,NCOR2,BAX,RXRA,GSTK1
G Beta Gamma Signaling	2.35	0.111	SRC,AKT2,GNAS,ADCY1,PRKAR1B,PRKAG2,AKT3,GNG7,EGFR
Gap Junction Signaling	2.33	0.0938	SRC,AKT2,GNAS,ADCY1,ADCY3,PRKAR1B,PRKAG2,AKT3,ITPR1,PLCH2,MAP2K1,EGFR
Colorectal Cancer Metastasis Signaling	2.33	0.0816	SRC,LRP5,AKT2,GNAS,ADCY3,BAX,GNG7,WNT7B,ADCY1,PRKAG2,PRKAR1B,AKT3,NOS2,MAP2K1,MMP17,EGFR
Nitric Oxide Signaling in the Cardiovascular System	2.24	0.107	AKT2,FLT1,FLT4,PRKAR1B,PRKAG2,AKT3,ITPR1,NOS3,MAP2K1
Circadian Rhythm Signaling	2.23	0.167	PER1,GRIN1,GRIN2C,VIPR2,GRIN2D
P2Y Purigenic Receptor Signaling Pathway	2.22	0.1	AKT2,GNAS,ADCY1,ADCY3,PRKAR1B,PRKAG2,AKT3,PLCH2,MAP2K1,GNG7
GPCR-Mediated Nutrient Sensing in Enteroendocrine Cells	2.21	0.114	GNAS,ADCY1,ADCY3,PRKAR1B,PRKAG2,ITPR1,PLCH2,GNG7
ERK5 Signaling	2.21	0.125	SRC,LIF,MEF2D,RPS6KA3,RPS6KA2,RPS6KA1,EGFR
Non-Small Cell Lung Cancer Signaling	2.17	0.123	AKT2,RARB,AKT3,ITPR1,RXRA,MAP2K1,EGFR
Role of Tissue Factor in Cancer	2.14	0.103	SRC,AKT2,F2RL1,RPS6KA3,AKT3,RPS6KA2,RPS6KA1,FGR,EGFR
FLT3 Signaling in Hematopoietic Progenitor Cells	2.08	0.119	AKT2,RPS6KA3,AKT3,RPS6KA2,RPS6KA1,MAP2K1,INPP5D
Thrombin Signaling	2.01	0.0823	SRC,AKT2,GNAS,ADCY1,ADCY3,AKT3,ARHGEF3,ITPR1,PLCH2,MAP2K1,GATA2,GNG7,EGFR
GABA Receptor Signaling	2.01	0.115	GABBR2,KCNN3,GABRA5,GNAS,ADCY1,ADCY3,AP2A2
RAR Activation	1.95	0.0807	NR2F1,SRC,AKT2,GNAS,ADCY1,RARB,ADCY3,PRKAG2,PRKAR1B,AKT3,NCOR2,RXRA,MAP2K1
IL-8 Signaling	1.95	0.0807	SRC,AKT2,GNAS,CCND3,ARAF,FLT1,FLT4,AKT3,BAX,MAP2K1,LASP1,GNG7,EGFR
PPARα/RXRα Activation	1.94	0.0833	NR2F1,GNAS,ADCY1,ADCY3,PRKAR1B,PRKAG2,NCOR2,IL1RAPL1,PLCH2,RXRA,MAP2K1,AP2A2
EGF Signaling	1.92	0.122	SRC,AKT2,AKT3,ITPR1,MAP2K1,EGFR
Hepatic Fibrosis / Hepatic Stellate Cell Activation	1.87	0.0816	COL5A1,IL4R,FLT1,FLT4,COL22A1,COL20A1,IL1RAPL1,BAX,COL27A1,COL25A1,TIMP2,EGFR
Phospholipase C Signaling	1.87	0.0765	HDAC9,SRC,GNAS,HDAC4,ADCY3,RPS6KA3,ARHGEF17,ITPR1,GNG7,PLA2G4D,MEF2D,ADCY1,ARHGEF3,MAP2K1
p70S6K Signaling	1.85	0.0928	SRC,AKT2,IL4R,F2RL1,AKT3,PPP2R2C,PLCH2,MAP2K1,EGFR
Citrulline-Nitric Oxide Cycle	1.84	0.4	NOS3,NOS2
CXCR4 Signaling	1.82	0.0833	SRC,PAK4,AKT2,GNAS,ADCY1,ADCY3,AKT3,ITPR1,MAP2K1,ELMO1,GNG7
GNRH Signaling	1.81	0.087	SRC,PAK4,GNAS,ADCY1,ADCY3,PRKAR1B,PRKAG2,ITPR1,MAP2K1,EGFR
Telomerase Signaling	1.79	0.0964	HDAC9,AKT2,HDAC4,AKT3,PPP2R2C,MAP2K1,EGFR,IL2RB
Dopamine Receptor Signaling	1.76	0.103	TH,GNAS,ADCY1,ADCY3,PRKAR1B,PRKAG2,PPP2R2C
Dopamine-DARPP32 Feedback in cAMP Signaling	1.75	0.0815	GRIN1,GNAS,GRIN2C,GRIN2D,ADCY1,ADCY3,PRKAR1B,PRKAG2,PPP2R2C,ITPR1,PLCH2
Gαs Signaling	1.72	0.0882	SRC,GNAS,VIPR2,ADCY1,ADCY3,PRKAR1B,PRKAG2,MAP2K1,GNG7
Ephrin Receptor Signaling	1.71	0.0774	EFNA2,SRC,GRIN1,PAK4,AKT2,GNAS,EPHB2,GRIN2C,GRIN2D,AKT3,MAP2K1,GNG7
Molecular Mechanisms of Cancer	1.7	0.0649	SRC,LRP5,PAK4,AKT2,GNAS,ADCY3,ARHGEF17,BAX,RASGRF1,CTNNA2,CCND3,WNT7B,ADCY1,PRKAR1B,PRKAG2,AKT3,BMP7,ARHGEF3,NOTCH1,MAP2K1
Glutamate Receptor Signaling	1.65	0.107	GRIN1,GRIK4,GRIN2C,GRIN2D,GRM4,GNG7
Amyotrophic Lateral Sclerosis Signaling	1.65	0.0909	GRIN1,GRIK4,GRIN2C,GRIN2D,NEFH,AKT3,BAX,SSR4
VEGF Signaling	1.61	0.0959	SRC,AKT2,FLT1,FLT4,AKT3,NOS3,MAP2K1
Melatonin Signaling	1.55	0.102	MTNR1B,ARAF,PRKAR1B,PRKAG2,PLCH2,MAP2K1
Role of IL-17F in Allergic Inflammatory Airway Diseases	1.54	0.133	RPS6KA3,RPS6KA2,RPS6KA1,MAP2K1
14-3-3-mediated Signaling	1.5	0.0851	SRC,AKT2,TP73,AKT3,BAX,RPS6KA1,PLCH2,MAP2K1
Synaptic Long Term Depression	1.48	0.0804	PLA2G4D,GNAS,PPP2R2C,GRM4,ITPR1,PLCH2,NOS3,NOS2,MAP2K1
Inhibition of Angiogenesis by TSP1	1.44	0.125	AKT2,SDC1,AKT3,NOS3
Cyclins and Cell Cycle Regulation	1.43	0.0952	MYT1,HDAC9,HDAC4,CCND3,CUL1,PPP2R2C
Cardiac β-adrenergic Signaling	1.42	0.0783	GNAS,ADCY1,ADCY3,PRKAR1B,PRKAG2,SLC8A2,PPP2R2C,PDE6B,GNG7
Guanine and Guanosine Salvage I	1.4	1	HPRT1
Anandamide Degradation	1.4	1	FAAH
Renin-Angiotensin Signaling	1.4	0.0816	PAK4,GNAS,ADCY1,ADCY3,PRKAR1B,PRKAG2,ITPR1,MAP2K1
PXR/RXR Activation	1.4	0.104	AKT2,PRKAR1B,PRKAG2,AKT3,RXRA
G-Protein Coupled Receptor Signaling	1.38	0.0647	SRC,AKT2,GNAS,VIPR2,ADCY3,GRM4,ADRA1D,GABBR2,ADCY1,PRKAG2,PRKAR1B,AKT3,RPS6KA1,MAP2K1,PDE6B
Gαi Signaling	1.38	0.0769	SRC,GABBR2,GNAS,ADCY1,ADCY3,PRKAR1B,PRKAG2,GRM4,GNG7
BMP signaling pathway	1.37	0.0923	ZNF423,PRKAR1B,PRKAG2,BMP7,PITX2,MAP2K1
AMPK Signaling	1.37	0.071	SRC,CAB39,AKT2,GNAS,PRKAR1B,RPTOR,PRKAG2,AKT3,PPP2R2C,NOS3,ADRA1D
PI3K Signaling in B Lymphocytes	1.34	0.0792	AKT2,IL4R,AKT3,PLEKHA4,ITPR1,PLCH2,MAP2K1,INPP5D
Endothelin-1 Signaling	1.33	0.0725	SRC,PLA2G4D,GNAS,ARAF,ADCY1,ADCY3,ITPR1,PLCH2,NOS3,NOS2
Netrin Signaling	1.32	0.114	PRKAR1B,PRKAG2,ABLIM2,ABLIM1
Calcium Signaling	1.32	0.0719	HDAC9,GRIN1,HDAC4,GRIN2C,GRIN2D,MEF2D,PRKAR1B,PRKAG2,SLC8A2,ITPR1

## Sheet: Table S5D - Pair 4
Ingenuity Canonical Pathways	-log(p-value)	Ratio	Molecules
PTEN Signaling	2.39	0.0849	FGFR3,FLT1,NTRK3,FLT4,PDPK1,INSR,OCRL,BCAR1,PRKCZ
G Protein Signaling Mediated by Tubby	2.06	0.143	PLCB4,GNAS,PLCB3,INSR
Axonal Guidance Signaling	2.03	0.0534	GNAS,PTCH1,SEMA6B,PLXNA2,ABLIM1,BCAR1,ADAMTS2,PDGFB,PRKCZ,EFNB2,PLCB4,NTRK3,EFNA5,BAIAP2,PRKAR1B,PLCB3,ABLIM2,SHANK2,BMP1
Circadian Rhythm Signaling	1.95	0.133	GRIN1,GRIN2A,VIPR2,GRIN2D
D-myo-inositol (1,4,5)-Trisphosphate Biosynthesis	1.9	0.176	PLCB4,PIP5KL1,PLCB3
1D-myo-inositol Hexakisphosphate Biosynthesis II (Mammalian)	1.9	0.176	SEC16A,INPP5A,OCRL
D-myo-inositol (1,3,4)-trisphosphate Biosynthesis	1.9	0.176	SEC16A,INPP5A,OCRL
D-myo-inositol (1,4,5)-trisphosphate Degradation	1.9	0.176	SEC16A,INPP5A,OCRL
Neuropathic Pain Signaling In Dorsal Horn Neurons	1.87	0.0814	GRIN1,PLCB4,GRIN2A,GRIN2D,PRKAR1B,PLCB3,PRKCZ
VDR/RXR Activation	1.77	0.0857	COL13A1,KLK6,NCOR2,CCL5,RXRA,PRKCZ
Dopamine-DARPP32 Feedback in cAMP Signaling	1.73	0.0667	GRIN1,PLCB4,GRIN2A,GNAS,GRIN2D,PRKAR1B,PLCB3,PPP2R2C,PRKCZ
Glutamate Receptor Signaling	1.61	0.0893	GRIN1,GRIN2A,GRIN2D,GRIK3,SLC1A7
Superpathway of D-myo-inositol (1,4,5)-trisphosphate Metabolism	1.59	0.136	SEC16A,INPP5A,OCRL
Synaptic Long Term Potentiation	1.57	0.0707	GRIN1,PLCB4,GRIN2A,GRIN2D,PRKAR1B,PLCB3,PRKCZ
Actin Cytoskeleton Signaling	1.57	0.0595	TIAM1,DIAPH2,MYH9,APC2,VAV3,BAIAP2,SSH2,BCAR1,PDGFB,FGF13
Hepatic Fibrosis / Hepatic Stellate Cell Activation	1.52	0.0612	IGF2,COL4A1,MYH9,IL1RAPL2,COL13A1,FLT1,FLT4,CCL5,PDGFB
CREB Signaling in Neurons	1.47	0.06	GRIN1,PLCB4,GRIN2A,GNAS,GRIN2D,GRIK3,PRKAR1B,PLCB3,PRKCZ
Leptin Signaling in Obesity	1.47	0.082	PLCB4,GNAS,PRKAR1B,PLCB3,POMC
GABA Receptor Signaling	1.47	0.082	GABRQ,GABRG3,GABBR2,GNAS,GABRE
nNOS Signaling in Neurons	1.43	0.093	GRIN1,GRIN2A,GRIN2D,PRKCZ
Hepatic Cholestasis	1.38	0.0606	GNAS,IL1RAPL2,ABCC1,PRKAR1B,INSR,RXRA,PRKCZ,IRAK1
Aryl Hydrocarbon Receptor Signaling	1.36	0.0636	AHRR,NFIX,CCND3,TP73,NCOR2,RXRA,SMARCA4
Phospholipase C Signaling	1.35	0.0546	PLCB4,GNAS,RHOG,HDAC4,HDAC10,PLCB3,ARHGEF3,ARHGEF9,PRKCZ,RALGDS
Adipogenesis pathway	1.34	0.0631	FGFR3,ATG5,EBF1,HDAC4,AGPAT2,HDAC10,KMT2B
STAT3 Pathway	1.32	0.0746	FGFR3,FLT1,NTRK3,FLT4,INSR
Sphingosine-1-phosphate Signaling	1.3	0.0667	PLCB4,GNAS,RHOG,PLCB3,SMPD3,PDGFB
Sperm Motility	1.3	0.0667	PLCB4,GNAS,CNGB1,PRKAR1B,PLCB3,PRKCZ

## Sheet: Table S5E - Pair 5
Ingenuity Canonical Pathways	-log(p-value)	Ratio	Molecules
Virus Entry via Endocytic Pathways	2.96	0.114	ITGB1,FLNB,ITSN1,FLNA,PIK3CD,AP1B1,PRKCZ,DNM2
Axonal Guidance Signaling	2.63	0.059	EFNA2,ITGB1,BMP4,GLI2,PLXNA3,SLIT1,ITSN1,UNC5A,WNT2B,BRCC3,PRKCZ,GNG7,HERC2,SRGAP3,CDK5,EFNB1,PRKAR1B,ADAM19,NFATC2,PIK3CD,SHANK2
Basal Cell Carcinoma Signaling	2.32	0.113	BMP4,GLI2,APC2,WNT2B,DVL3,TCF3
Inhibition of Matrix Metalloproteases	2.16	0.154	HSPG2,TIMP1,MMP15,LRP1
Role of Osteoblasts, Osteoclasts and Chondrocytes in Rheumatoid Arthritis	1.87	0.0643	ITGB1,LRP5,BMP4,APC2,WNT2B,NFATC2,PIK3CD,MAP3K5,TCF3,XIAP,LRP1
Neuropathic Pain Signaling In Dorsal Horn Neurons	1.85	0.0814	GRIN1,GRM1,PRKAR1B,GRM6,PIK3CD,ELK1,PRKCZ
HGF Signaling	1.82	0.0805	ITGB1,RAPGEF1,PIK3CD,MAP3K5,ELK1,ELK3,PRKCZ
NGF Signaling	1.75	0.0778	RPS6KA3,PIK3CD,MAP3K5,RPS6KA2,ELK1,SMPD3,PRKCZ
Factors Promoting Cardiogenesis in Vertebrates	1.72	0.0845	LRP5,BMP4,TCF3,PRKCZ,ACVR1B,LRP1
Caveolar-mediated Endocytosis Signaling	1.66	0.0926	ITGB1,FLNB,ITSN1,FLNA,DNM2
TR/RXR Activation	1.61	0.08	F10,SLC16A3,PIK3CD,NCOR2,RXRA,ATP2A1
Glutamate Receptor Signaling	1.6	0.0893	GRIN1,GRIK4,GRM1,GRM6,GNG7
Wnt/β-catenin Signaling	1.58	0.0634	LRP5,APC2,WNT2B,SOX14,PPP2R2C,DVL3,TCF3,ACVR1B,LRP1
IL-4 Signaling	1.57	0.0877	IL13RA1,NFATC2,PIK3CD,INPP5D,FCER2
Hematopoiesis from Multipotent Stem Cells	1.56	0.222	EPO,CSF3
Growth Hormone Signaling	1.54	0.0862	RPS6KA3,PIK3CD,RPS6KA2,ELK1,PRKCZ
Lanosterol Biosynthesis	1.53	1	LSS
UDP-N-acetyl-D-galactosamine Biosynthesis I	1.53	1	GALE
FLT3 Signaling in Hematopoietic Progenitor Cells	1.51	0.0847	RPS6KA3,PIK3CD,RPS6KA2,ELK1,INPP5D
IL-3 Signaling	1.48	0.0833	RAPGEF1,PIK3CD,ELK1,INPP5D,PRKCZ
HER-2 Signaling in Breast Cancer	1.48	0.0833	ITGB1,TSC1,PIK3CD,MAP3K5,PRKCZ
ERK/MAPK Signaling	1.48	0.0608	ITGB1,RAPGEF1,PRKAR1B,PPP2R2C,PIK3CD,MKNK2,ELK1,ELK3,ESR1
Dermatan Sulfate Degradation (Metazoa)	1.47	0.2	IDUA,IDS
PI3K/AKT Signaling	1.46	0.068	ITGB1,TSC1,PPP2R2C,PIK3CD,MAP3K5,INPP5D,PRKCZ
CREB Signaling in Neurons	1.45	0.06	GRIN1,GRIK4,GRM1,PRKAR1B,GRM6,PIK3CD,ELK1,PRKCZ,GNG7
Superpathway of Cholesterol Biosynthesis	1.43	0.12	NSDHL,MVK,LSS
mTOR Signaling	1.41	0.0592	DGKZ,TSC1,EIF3B,RPS6KA3,PPP2R2C,PIK3CD,RPS6KA2,EIF3L,PRKCZ
Nitric Oxide Signaling in the Cardiovascular System	1.4	0.0714	GUCY2D,FLT4,PRKAR1B,PIK3CD,PRKCZ,ATP2A1
Molecular Mechanisms of Cancer	1.36	0.0487	ITGB1,RAPGEF1,LRP5,BMP4,WNT2B,MAP3K5,TCF3,PRKCZ,XIAP,RB1,CDK5,PRKAR1B,PIK3CD,ELK1,LRP1
Protein Kinase A Signaling	1.34	0.0493	FLNB,MYH10,TCF3,PTPN12,PRKCZ,GNG7,FLNA,PRKAR1B,NFATC2,PDE8B,DUSP18,H1F0,ELK1,PTPRT
Amyotrophic Lateral Sclerosis Signaling	1.32	0.0682	PRPH,GRIN1,GRIK4,PIK3CD,XIAP,SSR4
ILK Signaling	1.31	0.0593	ITGB1,FLNB,MYH10,PARVB,FLNA,PPP2R2C,PIK3CD,DSP
Reelin Signaling in Neurons	1.31	0.0746	ITGB1,CDK5,MAPK8IP2,PIK3CD,DCX
